# Supplementary material
Source: HighWire-hosted journal article supplement (http://bmjopenquality.bmj.com/highwire/filestream/136127/field_highwire_adjunct_files/2/ds3596.pdf)
Supplement: ds3596.pdf [file ds3596.pdf]

## PDSA cycles – Improving the Quality of Weekend Handover at Yeovil District Hospital

|                                        | Aim                                                                                                                                          | Plan                                                              | Prediction                                                                                                                                             | Do                                                                                                                                                           | Study                                                                                               | Act                                                                                                                            |
|----------------------------------------|----------------------------------------------------------------------------------------------------------------------------------------------|-------------------------------------------------------------------|--------------------------------------------------------------------------------------------------------------------------------------------------------|--------------------------------------------------------------------------------------------------------------------------------------------------------------|-----------------------------------------------------------------------------------------------------|--------------------------------------------------------------------------------------------------------------------------------|
| <b>Cycle 1</b><br>Dec 2013             | Improve quality of weekend handover sheets                                                                                                   | Introduce a standardised proforma available on the Trust intranet | Doctors will handover more information about each patient                                                                                              | There was an improvement in the quality and clarity of handover<br>It needed more space to write and a for extra tick boxes for 'possible weekend discharge' | There was an overall improvement in quality, particularly patient identifiers, background and plans | Amend proforma according to feedback                                                                                           |
| <b>Cycle 2</b><br>Dec 2013             | Improve quality of weekend handover sheets                                                                                                   | Improve standardised proforma                                     | Increase usability                                                                                                                                     | There was an increase in the number of doctors using the handover and overall satisfaction                                                                   | Increased number of doctors using the proforma                                                      | Continue and implement in other specialties                                                                                    |
| <b>Cycle 3</b><br>February 2014        | Improve quality of weekend handover                                                                                                          | Education to stakeholders                                         | Doctors may handover less inappropriate jobs and further Identification of problems with new handover                                                  | There was an improvement in overall handover but no demonstrable reduction in inappropriate handovers                                                        | No new problems were identified, but issues with poor handwriting                                   | Problems could be addressed with e-handover. Aim to improve inappropriate handovers with experience                            |
| <b>Cycle 4</b><br>April 2014           | Reduce time taken to review patient notes at the weekend, reduce jobs for FY1 on call, ensure clear individual patient plans for the weekend | Introduction of Friday WR/weekend plan proforma                   | More jobs are done ready for the weekend, a reduction in the time taken for patient reviews at the weekend<br>Potential for resistance to form filling | Initially viewed as extra work, comments that two pages was too much, poor compliance<br>Good feedback from weekend team                                     | Felt it was not usable enough on a Friday                                                           | Incorporate the Friday ward round into the weekend planning sheet, make it one sheet. Amended with feedback taken from juniors |
| <b>Cycle 5</b><br>April 2014           | Increase usability                                                                                                                           | Improve the Friday ward round/ weekend plan sheet                 | Greater engagement with using the weekend sheet                                                                                                        | Doctors found this summary an improvement and less time consuming than the previous version                                                                  | Greater number of users                                                                             | Continue with current sheet and implement in other specialties, ensure distribution of sheet on a Thursday evening             |
| <b>Cycle 6</b><br>January 2014 onwards | Improve legibility of handover, location of patients and organisation of jobs                                                                | Electronic handover                                               | Will eliminate risk of losing sheets, make sections compulsory, legible and easier for jobs to be organised.                                           | Prototype designed with IT department but not yet fully implemented                                                                                          | Not yet achieved                                                                                    | To implement the e-handover in the newt coming months                                                                          |

# PDSA cycles – Improving the Quality of Weekend Handover at Yeovil District Hospital

Final handover proforma implemented following Cycle 2

Handover from:

Grade:

Date of handover:

Ward:

| Patient demographics/<br>sticker | Is job for:                                                  | Patient:                                                                                                                                                        | Relevant PMHx/<br>additional info | Main problem/diagnosis | Job | Management Plan: | Job<br>done? |
|----------------------------------|--------------------------------------------------------------|-----------------------------------------------------------------------------------------------------------------------------------------------------------------|-----------------------------------|------------------------|-----|------------------|--------------|
| Name<br>Hosp no.<br>DOB          | <input type="checkbox"/> Sat<br><input type="checkbox"/> Sun | <input type="checkbox"/> To see<br><input type="checkbox"/> To be aware of<br><input type="checkbox"/> Ix to chase<br><input type="checkbox"/> Possible w/e d/c |                                   |                        |     |                  |              |
| Name<br>Hosp no.<br>DOB          | <input type="checkbox"/> Sat<br><input type="checkbox"/> Sun | <input type="checkbox"/> To see<br><input type="checkbox"/> To be aware of<br><input type="checkbox"/> Ix to chase<br><input type="checkbox"/> Possible w/e d/c |                                   |                        |     |                  |              |
| Name<br>Hosp no.<br>DOB          | <input type="checkbox"/> Sat<br><input type="checkbox"/> Sun | <input type="checkbox"/> To see<br><input type="checkbox"/> To be aware of<br><input type="checkbox"/> Ix to chase<br><input type="checkbox"/> Possible w/e d/c |                                   |                        |     |                  |              |
| Name<br>Hosp no.<br>DOB          | <input type="checkbox"/> Sat<br><input type="checkbox"/> Sun | <input type="checkbox"/> To see<br><input type="checkbox"/> To be aware of<br><input type="checkbox"/> Ix to chase<br><input type="checkbox"/> Possible w/e d/c |                                   |                        |     |                  |              |
| Name<br>Hosp no.<br>DOB          | <input type="checkbox"/> Sat<br><input type="checkbox"/> Sun | <input type="checkbox"/> To see<br><input type="checkbox"/> To be aware of<br><input type="checkbox"/> Ix to chase<br><input type="checkbox"/> Possible w/e d/c |                                   |                        |     |                  |              |
